# Supplementary material
Source: HighWire-hosted journal article supplement (https://bmjopen.bmj.com/content/12/6/e057207)
Supplement: inline-supplementary-material-2 [file inline-supplementary-material-2.pdf]

## Search Strategy

### Medline

1. "Conservation of Natural Resources"/
2. Environmental Health/
3. exp Climate Change/
4. Greenhouse Effect/
5. ((planetary or sustain\*) adj3 health\*).tw,kw.
6. (environment\* adj1 (sustain\* or chang\* or competenc\* or health\*)).tw,kw.
7. (climate adj1 (chang\* or resilien\* or crisis or health or distress\*)).tw,kw.
8. (global\* adj1 warm\*).tw,kw.
9. (ecological adj1 health).tw,kw.
10. (ecohealth or (eco adj1 health) or onehealth).tw,kw.
11. or/1-10
12. education, medical/
13. curriculum/
14. Competency-Based Education/
15. ((medical or health or clinical) adj3 (educat\*ion or curricul\* or teaching)).tw,kw.
16. ((teaching or clinical\* or morning) adj2 (round\* or report\*)).tw,kw.
17. (learning adj1 objectiv\*).tw,kw.
18. competenc\*.ti,ab.
19. or/12-18
20. exp education, medical, graduate/ or education, medical, undergraduate/
21. clinical clerkship/
22. (resident or residents or residency or residencies or fellow? or fellowship\* or clerkship\*).tw,kw.
23. ((medical or medicine or clinical) adj2 (student\* or intern\* or trainee\* or learner\*)).tw,kw.
24. (ugme or pgme).tw,kw.
25. or/20-24
26. 11 and 19 and 25

### Embase

1. exp environmental health/
2. exp climate change/
3. greenhouse effect/
4. environmental sustainability/
5. ((planetary or sustain\*) adj3 health\*).tw,kw.
6. (environment\* adj1 (sustain\* or chang\* or competenc\* or health\*)).tw,kw.
7. (climate adj1 (chang\* or resilien\* or crisis or health or distress\*)).tw,kw.
8. (global\* adj1 warm\*).tw,kw.
9. (ecological adj1 health).tw,kw.
10. (ecohealth or (eco adj1 health) or onehealth).tw,kw.
11. ecosystem health/
12. or/1-11
13. medical education/
14. teaching round/

15. curriculum/
16. ((medical or health or clinical) adj3 (educat\*ion or curricul\* or teaching)).tw,kw.
17. ((teaching or clinical\* or morning) adj2 (round\* or report\*)).tw,kw.
18. (learning adj1 objectiv\*).tw,kw.
19. competenc\*.ti,ab.
20. or/13-19
21. medical school/ or residency education/
22. clinical education/
23. (resident or residents or residency or residencies or fellow? or fellowship\* or clerkship\*).tw,kw.
24. ((medical or medicine or clinical) adj2 (student\* or intern\* or trainee\* or learner\*)).tw,kw.
25. (ugme or pgme).tw,kw.
26. or/21-25
27. 12 and 20 and 26

### APA PsycINFO

1. exp environmental effects/ or exp climate change/ or global warming/
2. pollution/
3. ((planetary or sustain\*) adj3 health\*).tw.
4. (environment\* adj1 (sustain\* or chang\* or competenc\* or health\*)).tw.
5. (climate adj1 (chang\* or resilien\* or crisis or health or distress\*)).tw.
6. (global\* adj1 warm\*).tw.
7. (ecological adj1 health).tw.
8. (ecohealth or (eco adj1 health) or onehealth).tw.
9. or/1-8
10. medical education/
11. Curriculum/
12. ((medical or health or clinical) adj3 (educat\*ion or curricul\* or teaching)).tw.
13. ((teaching or clinical\* or morning) adj2 (round\* or report\*)).tw.
14. (learning adj1 objectiv\*).tw.
15. competenc\*.tw.
16. or/10-15
17. medical internship/ or medical residency/ or psychiatric training/
18. Medical Students/
19. (ugme or pgme).tw.
20. (resident or residents or residency or residencies or fellow? or fellowship\* or clerkship\*).tw.
21. ((medical or medicine or clinical) adj2 (student\* or intern\* or trainee\* or learner\*)).tw.
22. or/17-21
23. 9 and 16 and 22

### CINAHL

#### Search

#### Terms    Search Options

S25    S9 AND S23 AND S24

- S24 S16 OR S17 OR S18 OR  
S19 OR S20 OR S21 OR  
S22
- S23 S10 OR S11 OR S12 OR  
S13 OR S14 OR S15
- S22 competenc\*
- S21 (learning N1 objectiv\*)
- S20 ((teaching or clinical\* or  
morning) N2 (round\* or  
report\*))
- S19 ((medical or health or  
clinical) N3 (educat\*ion or  
curricul\* or teaching))
- S18 (MH "Education,  
Competency-Based")
- S17 (MH "Curriculum+")
- S16 (MH "Education, Medical+")
- S15 (ugme or pgme)
- S14 ((medical or medicine or  
clinical) N2 (student\* or  
intern\* or trainee\* or  
learner\*))
- S13 (resident or residents or  
residency or residencies or  
fellow\* or fellowship\* or  
clerkship\*)
- S12 (MH "Schools, Medical")
- S11 (MH "Students, Medical")
- S10 (MH "Internship and  
Residency")
- S9 S1 OR S2 OR S3 OR S4 OR  
S5 OR S6 OR S7 OR S8

- S8 (ecohealth or (eco N1 health) or onehealth)
- S7 (ecological N1 health)
- S6 (global\* N1 warm\*)
- S5 (climate N1 (chang\* or resilien\* or crisis or health or distress\*))
- S4 (environment\* N1 (sustain\* or chang\* or competenc\* or health\*))
- S3 ((planetary or sustain\*) N3 health\*)
- S2 (MH "Greenhouse Effect") OR (MH "Climate Change")
- S1 (MH "Environmental Health") OR (MH "Environmental Sustainability") OR (MH "Conservation of Natural Resources+") OR (MH "Carbon Footprint")

Global Health

| #   | Query                                                                      |
|-----|----------------------------------------------------------------------------|
| S17 | S7 AND S11 AND S16                                                         |
| S16 | S12 OR S13 OR S14 OR S15                                                   |
| S15 | competenc*                                                                 |
| S14 | (learning N1 objectiv*)                                                    |
| S13 | ((teaching or clinical* or morning) N2 (round* or report*))                |
| S12 | ((medical or health or clinical) N3 (educat*ion or curricul* or teaching)) |

|     |                                                                                             |
|-----|---------------------------------------------------------------------------------------------|
| S11 | S8 OR S9 OR S10                                                                             |
| S10 | (ugme or pgme)                                                                              |
| S9  | ((medical or medicine or clinical) N2 (student* or intern* or trainee* or learner*))        |
| S8  | (resident or residents or residency or residencies or fellow* or fellowship* or clerkship*) |
| S7  | S1 OR S2 OR S3 OR S4 OR S5 OR S6                                                            |
| S6  | (ecohealth or (eco N1 health) or onehealth)                                                 |
| S5  | (ecological N1 health)                                                                      |
| S4  | (global* N1 warm*)                                                                          |
| S3  | (climate N1 (chang* or resilien* or crisis or health or distress*))                         |
| S2  | (environment* N1 (sustain* or chang* or competenc* or health*))                             |
| S1  | ((planetary or sustain*) N3 health*)                                                        |

**Scopus**

( TITLE-ABS ( ( ( PLANETARY OR SUSTAIN\* ) W/1 HEALTH\* ) ) OR TITLE-ABS ( ( ENVIRONMENT\* W/1 ( SUSTAIN\* OR CHANG\* OR COMPETENC\* OR HEALTH\* ) ) ) OR TITLE-ABS ( ( CLIMATE W/1 ( CHANG\* OR RESILIEN\* OR CRISIS OR HEALTH OR DISTRESS\* ) ) ) OR TITLE-ABS ( ( GLOBAL\* W/1 WARM\* ) ) OR TITLE-ABS ( ( ECOLOGICAL W/1 HEALTH ) ) OR TITLE-ABS ( ( ECOHEALTH OR ( ECO W/1 HEALTH ) OR ONEHEALTH ) ) ) AND ( TITLE-ABS ( ( ( MEDICAL OR HEALTH OR CLINICAL ) W/2 ( EDUCAT\*ION OR CURRICUL\* OR TEACHING ) ) ) OR TITLE-ABS ( ( ( TEACHING OR CLINICAL\* OR MORNING ) W/2 ( ROUND\* OR REPORT\* ) ) ) OR TITLE-ABS ( ( LEARNING W/1 OBJECTIV\* ) ) OR TITLE-ABS ( COMPETENC\* ) ) AND ( TITLE-ABS ( ( RESIDENT OR RESIDENTS OR RESIDENCY OR RESIDENCIES OR FELLOW? OR FELLOWSHIP\* OR CLERKSHIP\* ) ) OR TITLE-ABS ( ( ( MEDICAL OR MEDICINE OR CLINICAL ) W/2 ( STUDENT\* OR INTERN\* OR TRAINEE\* OR LEARNER\* ) ) ) OR TITLE-ABS ( ( UGME OR PGME ) ) )
